# Supplementary material for: Regulation of density of functional presynaptic terminals by local energy supply
Source: PubMed Central journal article supplement (PMC4504454; doi:10.1186/s13041-015-0132-z), 2015-07-17

**A**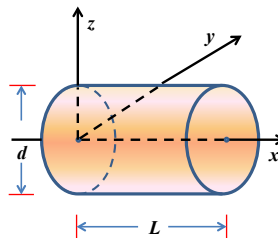**B**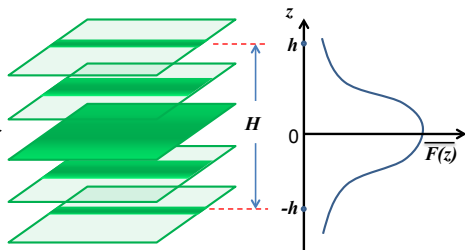**D**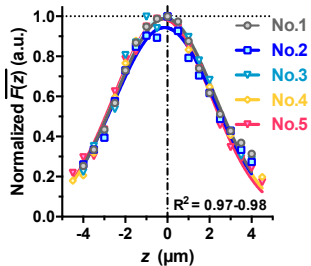**E**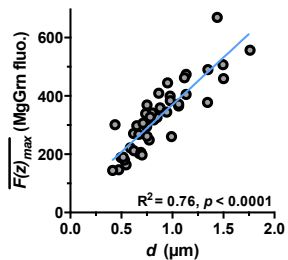**F**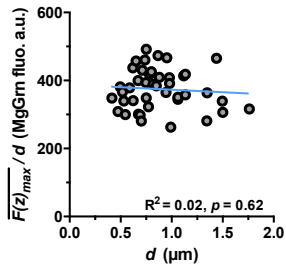

Supplement: 13041_2015_132_MOESM1_ESM.pdf [file 13041_2015_132_MOESM1_ESM.pdf]
